# Supplementary material
Source: publisher figshare collection journal article supplement (https://acs.figshare.com/ndownloader/files/13086761)
Supplement: Supplementary file 1 [file 13086761]

Supporting Information for

**Facile Oriented Immobilization and Purification of His-Tagged  
Organophosphohydrolase on Virus-like Mesoporous Silica  
Nanoparticles for Organophosphate Bioremediation**

Liya Zhou<sup>†</sup>, Jiaojiao Li<sup>†</sup>, Jing Gao<sup>†</sup>, Huan Liu<sup>†</sup>, Saiguang Xue<sup>†</sup>, Li Ma<sup>†</sup>,

Guangxiu Cao<sup>†</sup>, Zhihong Huang<sup>†</sup>, Yanjun Jiang<sup>\*,†,‡</sup>

<sup>†</sup> School of Chemical Engineering and Technology, Hebei University of Technology,  
8 Guangrong Road, Hongqiao District, Tianjin, 300130, P. R. China

<sup>‡</sup> National-Local Joint Engineering Laboratory for Energy Conservation of Chemical  
Process Integration and Resources Utilization, Hebei University of Technology, 8  
Guangrong Road, Hongqiao District, Tianjin, 300130, P. R. China

\*Corresponding Author: E-mail: [yanjunjiang@hebut.edu.cn](mailto:yanjunjiang@hebut.edu.cn);

TEL: +86-22-60204945

Number of pages: 12

Number of schemes: 1

Number of figures: 7

Number of tables: 2

### **Application and reusability of OpdA@Ni-NTA-VMSN in decontamination of methyl parathion on fruits or vegetables**

Fresh grapes (12.35 g) or cucumbers (10.03 g) were contaminated with 380 nmol methyl parathion. After 30 min, fruits or vegetables were submerged in a solution of tap water (25 mL, pH 7.4) supplied with 10 mg of OpdA@Ni-NTA-VMSN. The solution was stirred for 1 h at 25 °C. Then, the OpdA@Ni-NTA-VMSN was recovered by centrifugation and rinsed three times with Tris-HCl buffer before the next washing batch. The degradation was determined by monitoring p-nitrophenol production at 410 nm.

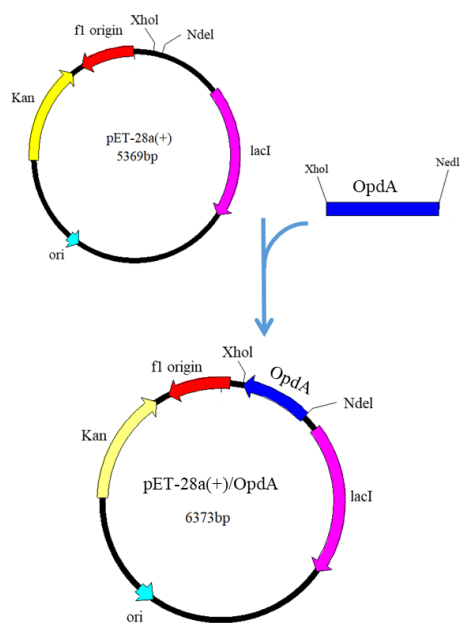

Scheme S1. The engineered plasmid pET-28a (+)/OpdA

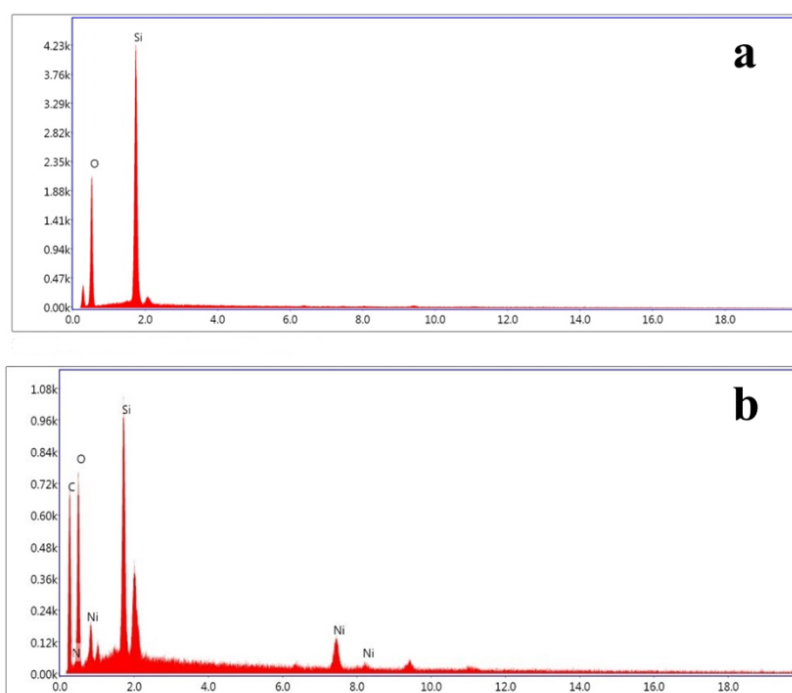

Figure S1 EDX analysis of (a) VMSN and (b) Ni-NTA-VMSN

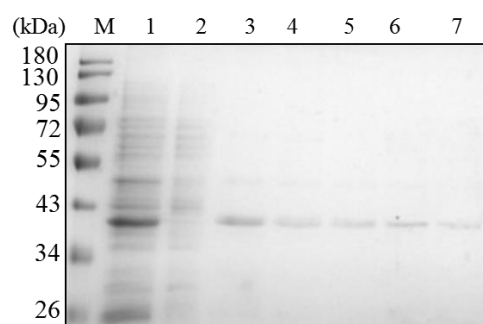

Figure S2 SDS-PAGE analysis. Lane M: protein marker; lane 1: cell lysates; lane 2: supernatant after mixing with Ni-NTA-VMSN; lane 3-7: eluted protein of 1st to 5th runs (reusability).

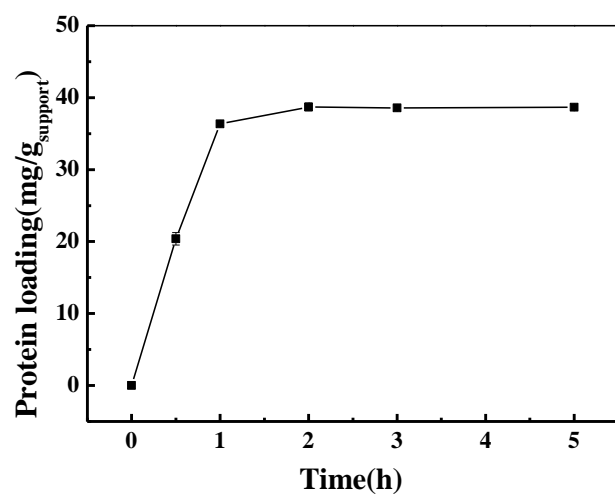

Figure S3 Protein loading of His-OpdA under different adsorption time at 5:1 ratio (w/w) of Ni-NTA-VMSN to total protein.

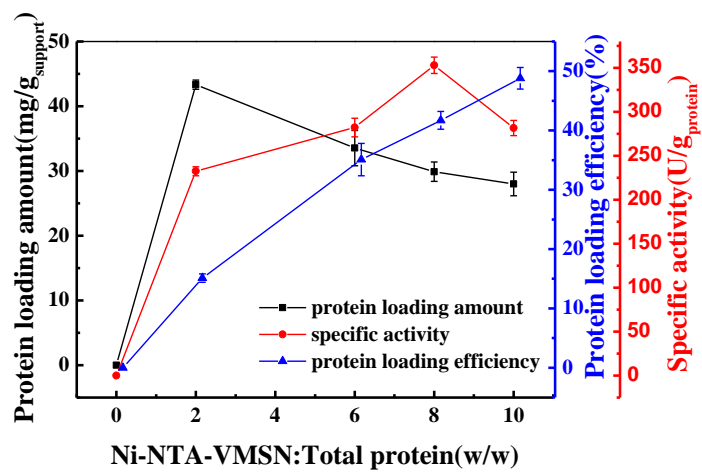

Figure S4 Protein loading amount, protein loading efficiency and specific activity of OpdA@Ni-NTA-VMSN at different ratio (w/w) of Ni-NTA-VMSN to total protein.

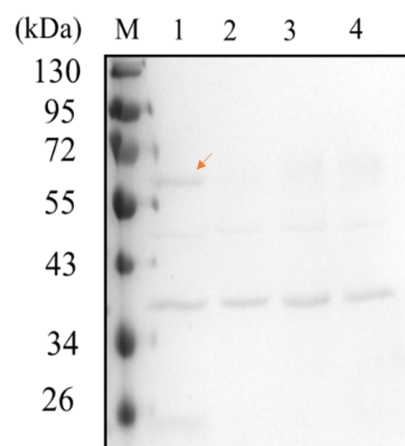

Figure S5 SDS-PAGE analysis. Lane M: protein marker; lane 1-4: eluted protein from OpdA@Ni-NTA-VMSN at different mass ratio (w/w) of Ni-NTA-VMSN to total protein (10:1, 8:1, 6:1, 2:1).



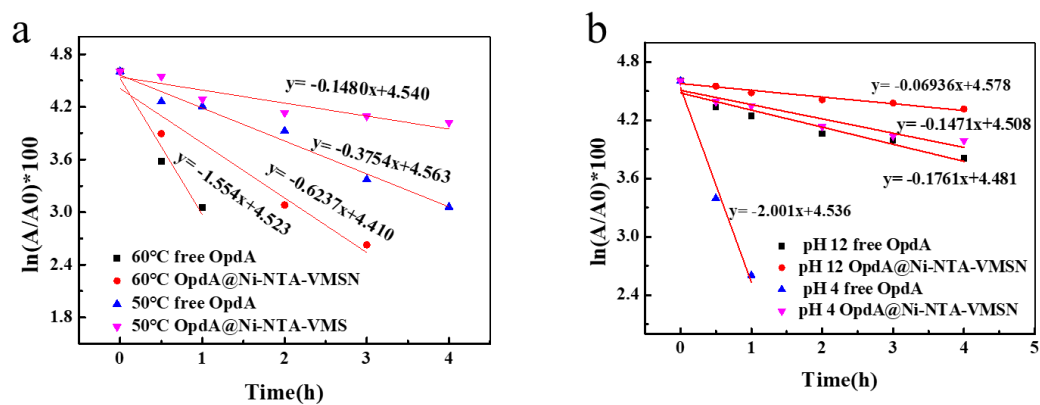

Figure S6 (a) Thermal inactivation kinetic of free OpdA and OpdA@Ni-NTA-VMSN at 50 °C and 60 °C. (b) pH deactivation kinetic of free OpdA and OpdA@Ni-NTA-VMSN at 4.0 and 12.0.

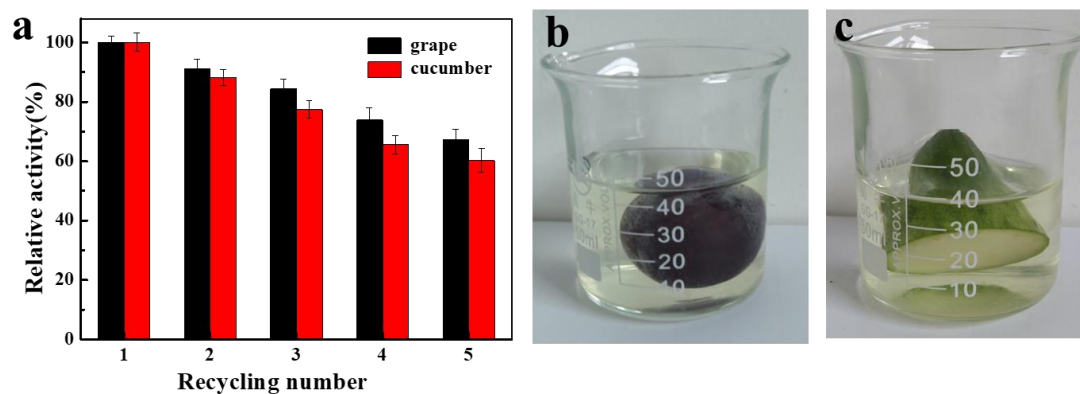

Figure S7 (a) Reusability of OpdA@Ni-NTA-VMSN. The Degradation of 380 nmol methyl parathion from contaminated grapes (b, 12.35 g) and cucumbers (c, 10.03 g) in 25 mL tap water using 10 mg OpdA@Ni-NTA-VMSN.

Table S1 Thermal deactivation kinetic parameters

| Thermal deactivation kinetic<br>parameters | 50 °C         |              | 60 °C         |              |
|--------------------------------------------|---------------|--------------|---------------|--------------|
|                                            | $k_d(h^{-1})$ | $t_{1/2}(h)$ | $k_d(h^{-1})$ | $t_{1/2}(h)$ |
| free OpdA                                  | 0.3754        | 1.846        | 1.554         | 0.4451       |
| OpdA@Ni-NTA-VMSN                           | 0.1480        | 4.682        | 0.6237        | 1.111        |

Table S2 pH deactivation kinetic parameters

| pH deactivation kinetic<br>parameters | pH 4.0               |                     | pH 12.0              |                     |
|---------------------------------------|----------------------|---------------------|----------------------|---------------------|
|                                       | $k_d(\text{h}^{-1})$ | $t_{1/2}(\text{h})$ | $k_d(\text{h}^{-1})$ | $t_{1/2}(\text{h})$ |
| free OpdA                             | 2.001                | 0.3463              | 0.1761               | 3.935               |
| OpdA@Ni-NTA-VMSN                      | 0.1471               | 4.711               | 0.06936              | 9.991               |
